# Supplementary material for: Seasonal patterns of surface inorganic carbon system variables in the Gulf of Mexico inferred from a regional high-resolution ocean-biogeochemical model
Source: Copernicus journal article supplement (doi:10.5194/bg-2019-430), 2019-11-07
Supplement: Supplementary file 1 [file bg-2019-430-supplement.pdf]

Supplement of

**Seasonal patterns of surface inorganic carbon system variables in the Gulf of Mexico inferred from a regional high-resolution ocean-biogeochemical model.**

Fabian A. Gomez et al.

Correspondence to: Fabian A. Gomez ([fabian.gomez@pucv.cl](mailto:fabian.gomez@pucv.cl))

## **Contents**

1. Carbon module formulation
2. DIC and alkalinity in the Mississippi-Atchafalaya river system
3. Atmospheric CO<sub>2</sub>
4. Model and observed pCO<sub>2</sub> patterns across the Gulf of Mexico
5. Seasonal patterns for sea surface temperature
6. Seasonal amplitude for surface aragonite saturation state and salinity
7. Seasonal patterns for surface salinity
8. Seasonal patterns for surface dissolved inorganic carbon
9. Seasonal patterns for surface total alkalinity
10. Zonal winds and carbon chemistry off northern Yucatan coast

## 1. Carbon module formulation

The carbon system module adds two new state variables to the GoMBio model: dissolved inorganic carbon (DIC,  $\text{mmol m}^{-3}$ ) and total alkalinity (TA,  $\text{mmol m}^{-3}$ ). These new state variables are described following Laurent et al. (2017) formulations. Accordingly, the time change of DIC and TA is given by the following equations:

$$\frac{\delta DIC}{\delta t} = r_{C:N} \cdot (-\mu_N + \text{excr}_{NH_4} + \text{remin}_{NH_4}) \quad (1)$$

$$\frac{\delta TA}{\delta t} = \mu_{NO_3} - \mu_{NH_4} + \text{excr}_{NH_4} + \text{remin}_{NH_4} - 2 \cdot \text{nitr} \quad (2)$$

where

$$\mu_N = \mu_{NO_3} + \mu_{NH_4}$$

$$\mu_{NO_3} = \mu_{NO_3}(\text{PS}) + \mu_{NO_3}(\text{PL})$$

$$\mu_{NH_4} = \mu_{NH_4}(\text{PS}) + \mu_{NH_4}(\text{PL})$$

$\mu_{NO_3}(\text{PS})$  is new nanophytoplankton production

$\mu_{NH_4}(\text{PS})$  is regenerated nanophytoplankton production

$\mu_{NO_3}(\text{PL})$  is new diatom production

$\mu_{NH_4}(\text{PL})$  is regenerated diatom production

$$\text{excr}_{NH_4} = \text{excr}(\text{ZS}) + \text{excr}(\text{ZL})$$

$\text{excr}(\text{ZS})$  is  $\text{NH}_4$  excretion by microzooplankton

$\text{excr}(\text{ZL})$  is  $\text{NH}_4$  excretion by mesozooplankton

$$\text{remin}_{NH_4} = \text{decomp}_{NH_4}(\text{DS}) + \text{decomp}_{NH_4}(\text{DL}) + \text{decomp}_{NH_4}(\text{DON})$$

$\text{decomp}(\text{DS})$  is decomposition of small detritus to  $\text{NH}_4$

$\text{decomp}(\text{DL})$  is decomposition of large detritus to  $\text{NH}_4$

$\text{decomp}(\text{DON})$  is decomposition of DON to  $\text{NH}_4$

*nitr*: nitrification

$r_{C:N}$  is the carbon to nitrogen ratio

The formulations for  $\mu_{NO_3}(\text{PS})$ ,  $\mu_{NO_3}(\text{PL})$ ,  $\mu_{NH_4}(\text{PS})$ ,  $\mu_{NH_4}(\text{PL})$ ,  $\text{excr}(\text{ZS})$ ,  $\text{excr}(\text{ZL})$ ,  $\text{decomp}(\text{DS})$ ,  $\text{decomp}(\text{DL})$ ,  $\text{decomp}(\text{DON})$ , and *nitr* are described in Gomez et al. (2018) (see their Supplement Material: <https://doi.org/10.5194/bg-15-3561-2018-supplement>).

Sediment fluxes for DIC and TA are calculated according to Fennel et al. (2007) formulations, assuming instantaneous organic matter remineralization:

$$\frac{\delta DIC}{\delta t} = \frac{r_{C:N}}{\Delta z} \cdot [(w_P PL + w_{DS} DS + w_{DL} DL)] \quad (3)$$

$$\frac{\delta TA}{\delta t} = \left[ (w_P PL + w_{DS} DS + w_{DL} DL) \cdot \frac{4}{16\Delta z} \right] \quad (4)$$

where

$w_P$  is diatom sinking velocity ( $m s^{-1}$ ).

$w_{DS}$  is small detritus sinking velocity ( $m s^{-1}$ )

$w_{LS}$  is large detritus sinking velocity ( $m s^{-1}$ )

PL: diatom concentration ( $mmol N m^{-3}$ )

DS: small detritus concentration ( $mmol N m^{-3}$ )

DL: large detritus concentration ( $mmol N m^{-3}$ )

$\Delta z$ : bottom layer thickness (m)

The 4/16 factor in (4) accounts for the coupled nitrification-denitrification impact on the  $NH_4$  sediment flux.

$r_{C:N}$  is the carbon to nitrogen ratio

The air-sea  $CO_2$  flux is described by Wanninkhof (2014) formulation:

$$F_{CO_2} = k \cdot \langle U_{10}^2 \rangle \cdot \left( \frac{Sc}{660} \right)^{-0.5} \cdot \kappa_0 \cdot (pCO_2^{water} - pCO_2^{air}) \cdot \frac{24}{100} \quad (5)$$

where

$F_{CO_2}$  is in  $mmol CO_2 m^{-2} day^{-1}$

$k = 0.251 (cm h^{-1})(m s^{-2})^{-2}$

$U_{10}$  is wind speed at 10 m height ( $m s^{-1}$ )

$\langle U_{10}^2 \rangle$  is the second moment of  $U_{10}$  ( $m s^{-1}$ )<sup>2</sup>

Sc is the Schmidt number for  $CO_2$  (dimensionless)

$\kappa_0$  is the solubility of  $CO_2$  ( $mmol C m^{-3} atm^{-1}$ )

$pCO_2^{water}$  is the surface ocean  $pCO_2$  (atm)

$pCO_2^{air}$  is the atmospheric  $pCO_2$  (atm)

## 2. DIC and alkalinity in the Mississippi-Atchafalaya river system

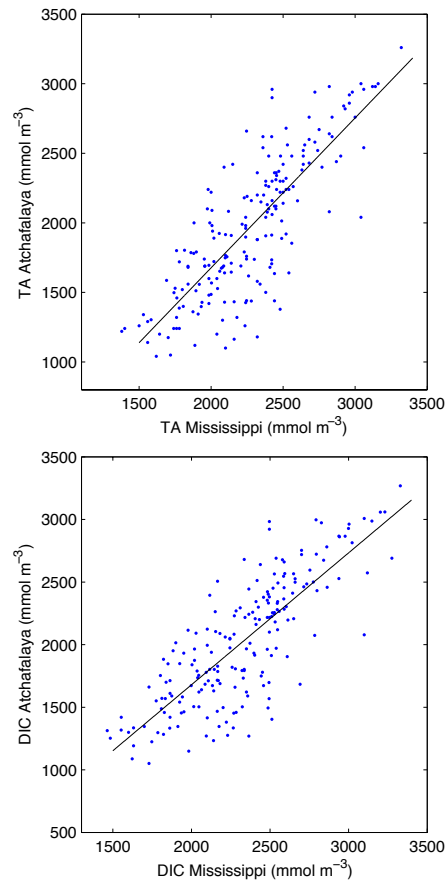

Figure S1. a) Scatterplot and adjusted linear regression for total alkalinity (TA) in the Mississippi river versus the Atchafalaya river; b) same as panel a but for dissolved inorganic carbon (DIC). The adjusted linear regressions are  $TA_{AT} = 1.069 TA_{MS} - 456.4$  ( $R^2 = 0.65$ ), and  $DIC_{AT} = 1.045 TA_{MS} - 402.0$  ( $R^2 = 0.64$ ).

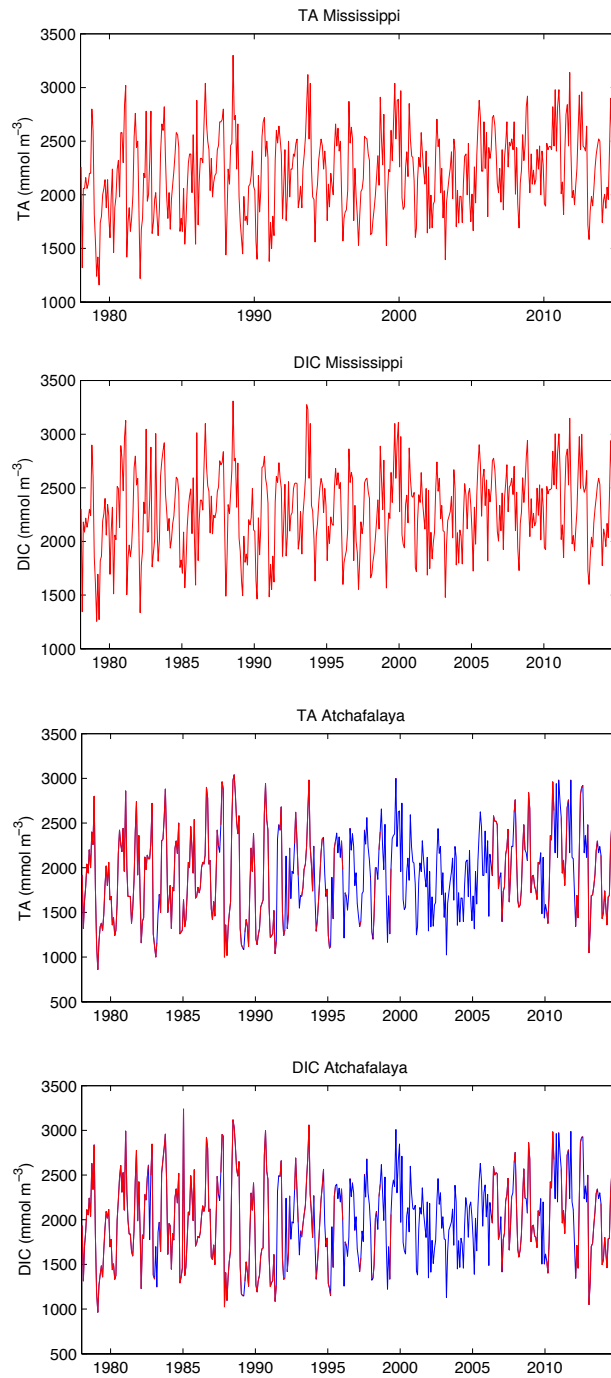

Figure S2. Time series of total alkalinity (TA) and dissolved inorganic carbon (DIC) in the Mississippi and Atchafalaya rivers. Red and blue lines in Atchafalaya river series are observed and interpolated values, respectively.

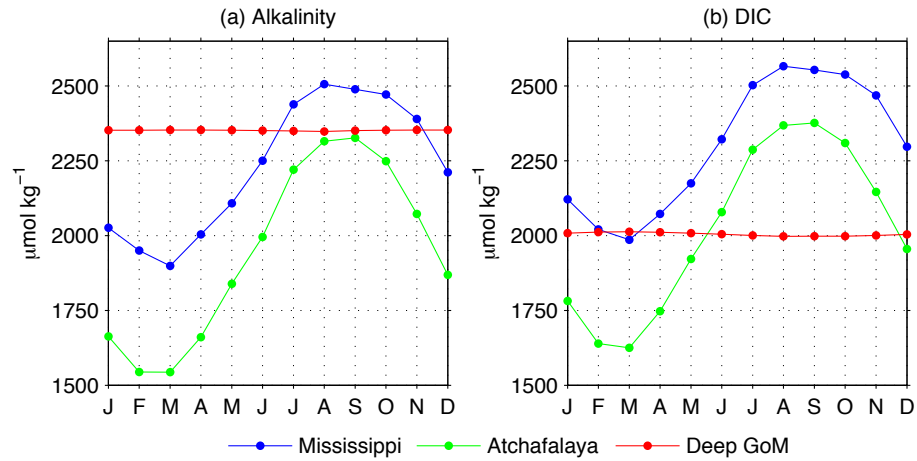

Figure S3. (a) Monthly mean alkalinity for the Mississippi and Atchafalaya rivers, as well as surface alkalinity over the deep Gulf of Mexico (deep GoM, derived from model's outputs), during 1981-2014. (b) As panel (a) but for dissolved inorganic carbon.

### 3. Atmospheric CO<sub>2</sub>

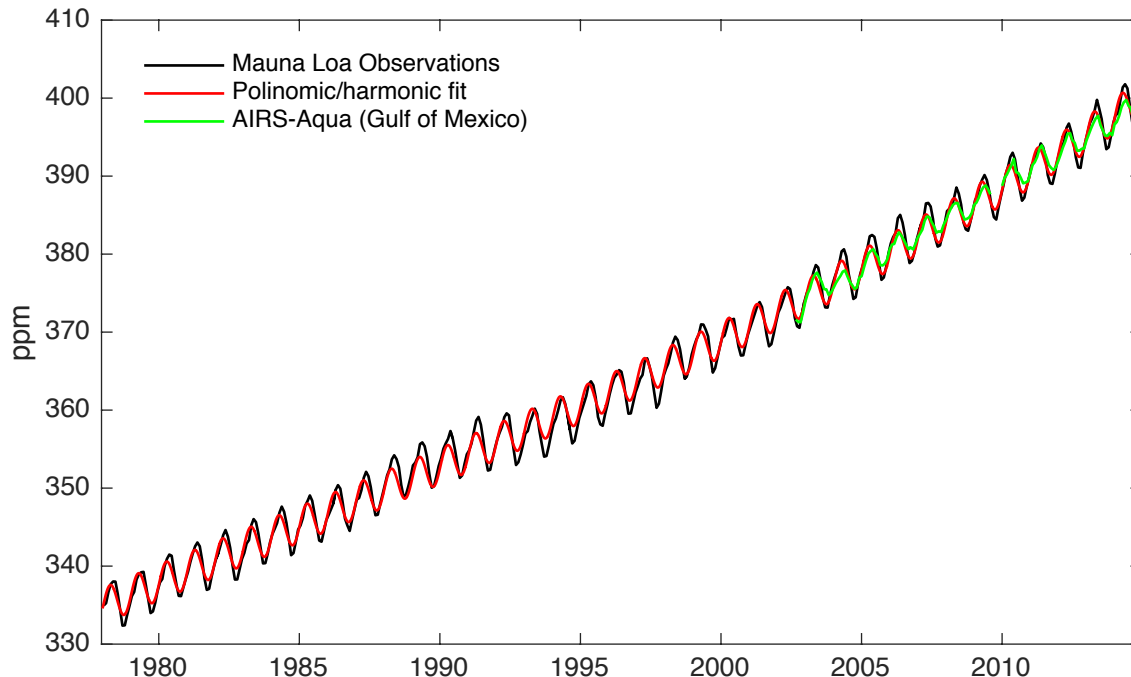

Figure S4. Monthly time series of atmospheric CO<sub>2</sub>: Mauna Loa observations (black), polynomial-harmonic function adjusted to the Mauna Loa observations (red), and AIRS-Aqua CO<sub>2</sub> in the Gulf of Mexico (green).

The adjusted function used to prescribe atmospheric CO<sub>2</sub> (red line) is given by:

$$\begin{aligned} x\text{CO}_2(t) = & 334.8763 + 1.5127 \cdot t - 0.0055 \cdot t^2 + 0.0003 \cdot t^3 + \\ & 2.7656 \cdot \sin(2\pi t) - 0.9735 \cdot \cos(2\pi t) - 0.4750 \cdot \sin(2\pi t) + 0.6721 \cdot \cos(2\pi t) - \\ & 0.0755 \cdot \sin(2\pi t) + 0.0376 \cdot \cos(2\pi t) + 0.0505 \cdot \sin(2\pi t) - 0.0382 \cdot \cos(2\pi t) \end{aligned}$$

where  $x\text{CO}_2$  is the mole fraction of CO<sub>2</sub> in ppm and  $t$  in years since January 1<sup>st</sup> 1978.

The adjusted values compare well with CO<sub>2</sub> observations from the Atmospheric Infrared Sounder (AIRS; <https://airs.jpl.nasa.gov/>; last access August 16<sup>th</sup>, 2018) spectrometer over the Gulf of Mexico during 2002-2014. Note that the AIRS series is column (stratospheric) CO<sub>2</sub>. Although differences can be expected between surface and column CO<sub>2</sub>, those differences are few ppm in the GoM.



#### 4. Model and observed pCO<sub>2</sub> patterns across the Gulf of Mexico

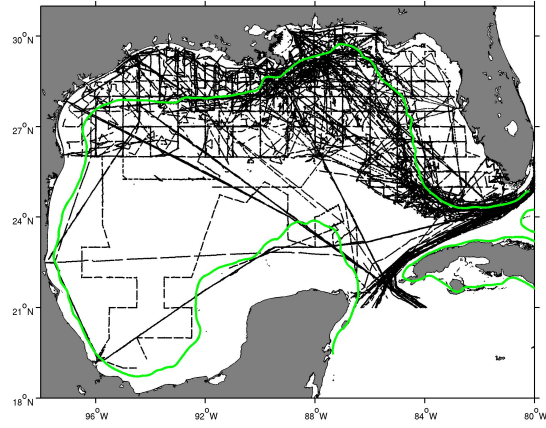

Figure S5. Tracks from ships of opportunity (SOOP) and research vessels that collected surface pCO<sub>2</sub> during 2005-2014. Green contour depicts the 200 m isobath.

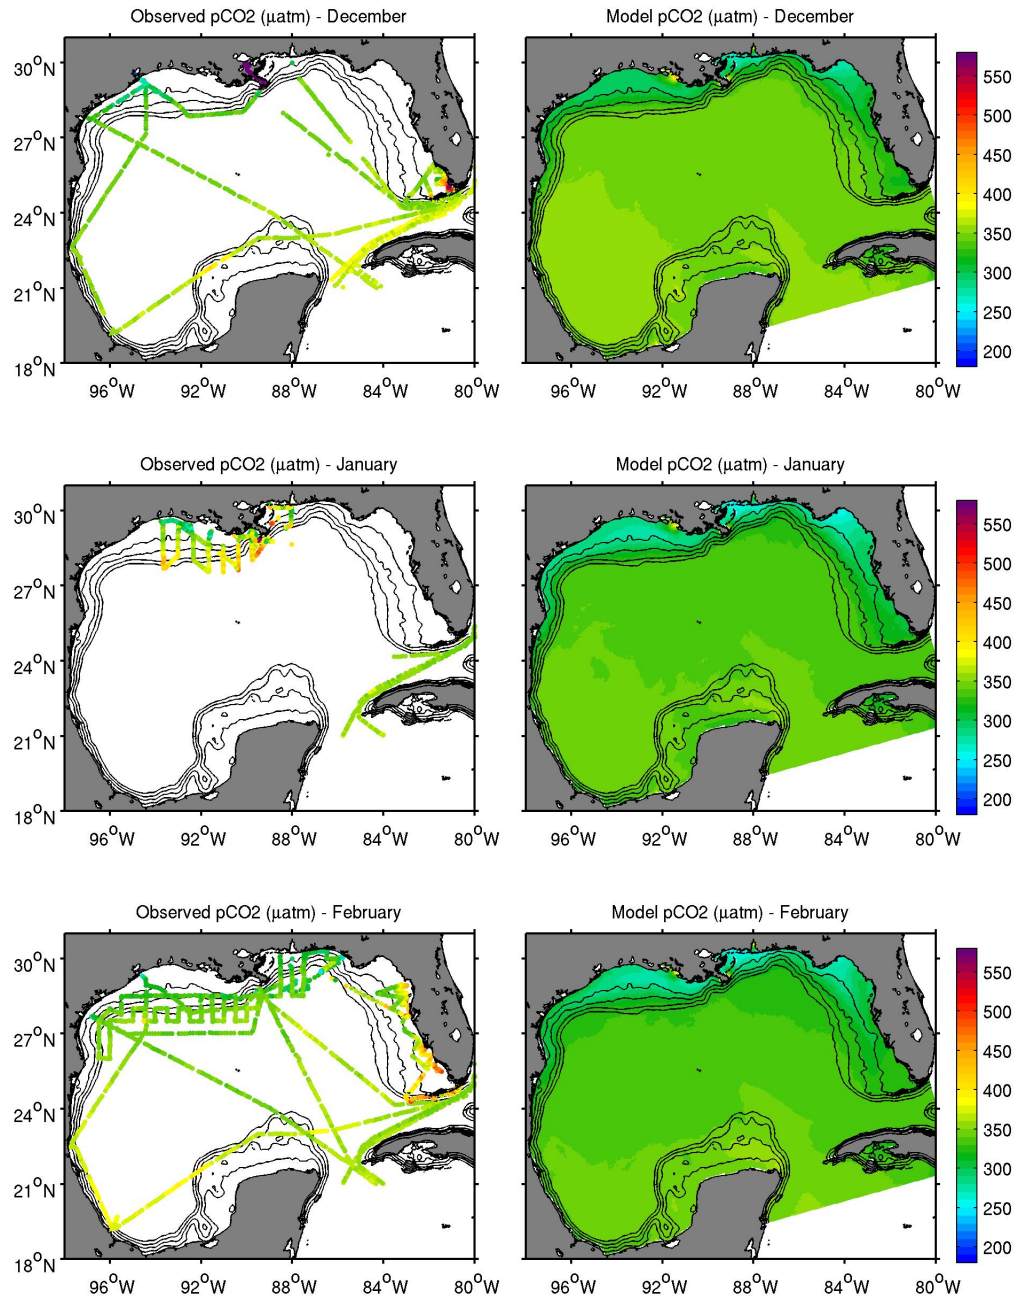

Figure S6. Monthly patterns of  $p\text{CO}_2$ : Observed  $p\text{CO}_2$  (left panels) include measurements collected in research vessels and ships of opportunity during 2005-2014. Model  $p\text{CO}_2$  (right panels) correspond to the monthly climatological mean from 2005-2014. Note that left panels in Fig. S6 display the raw  $p\text{CO}_2\text{GoM}_{2018}$  measurements (not climatological averages), which can explain the smoother model's patterns when compared to the observations.

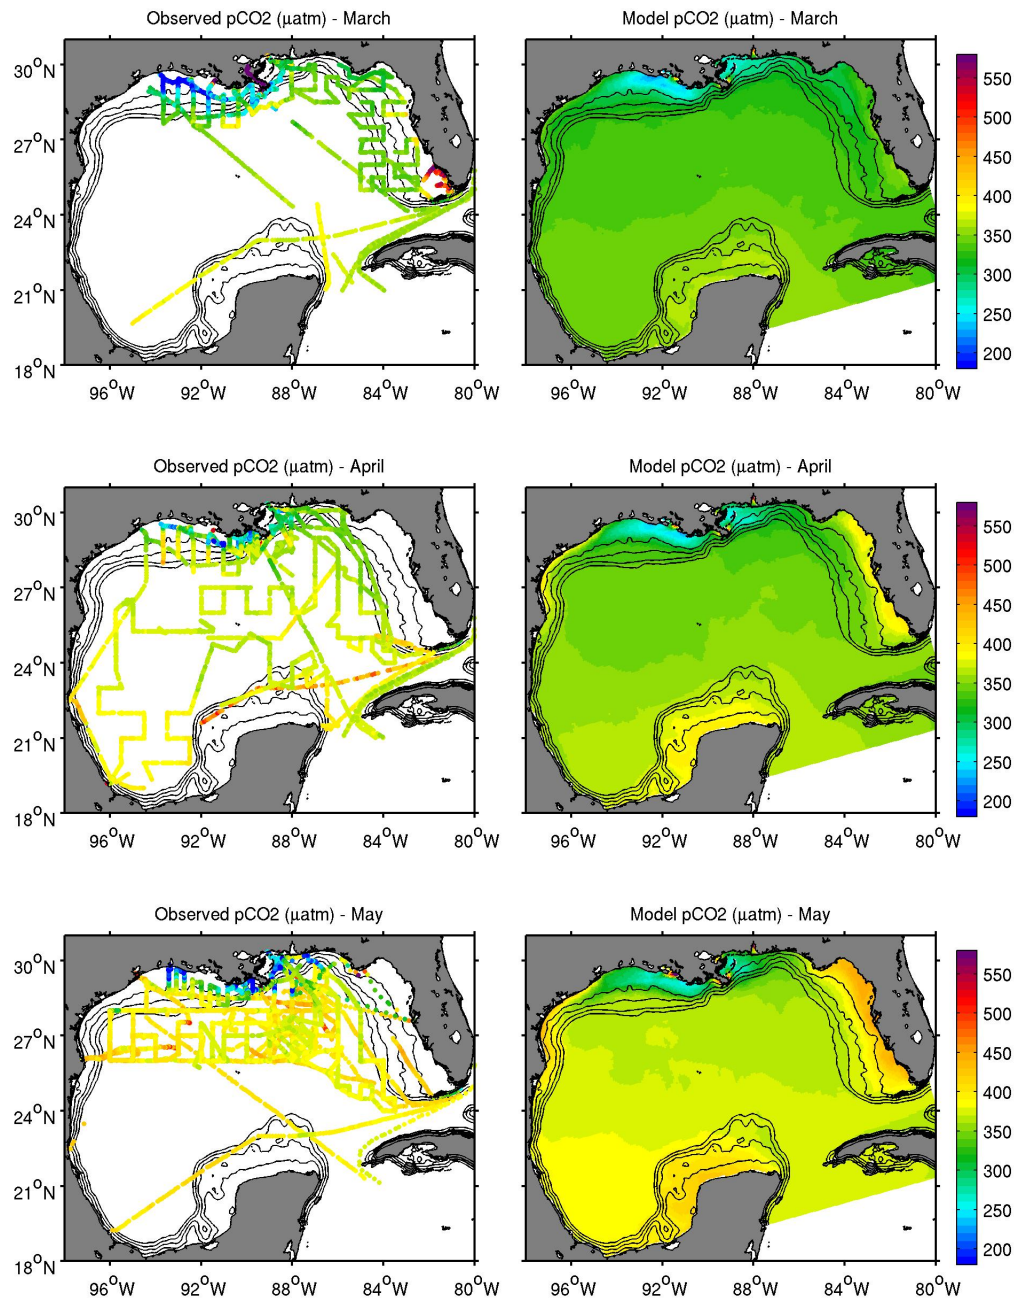

Figure S6. (Continuation).

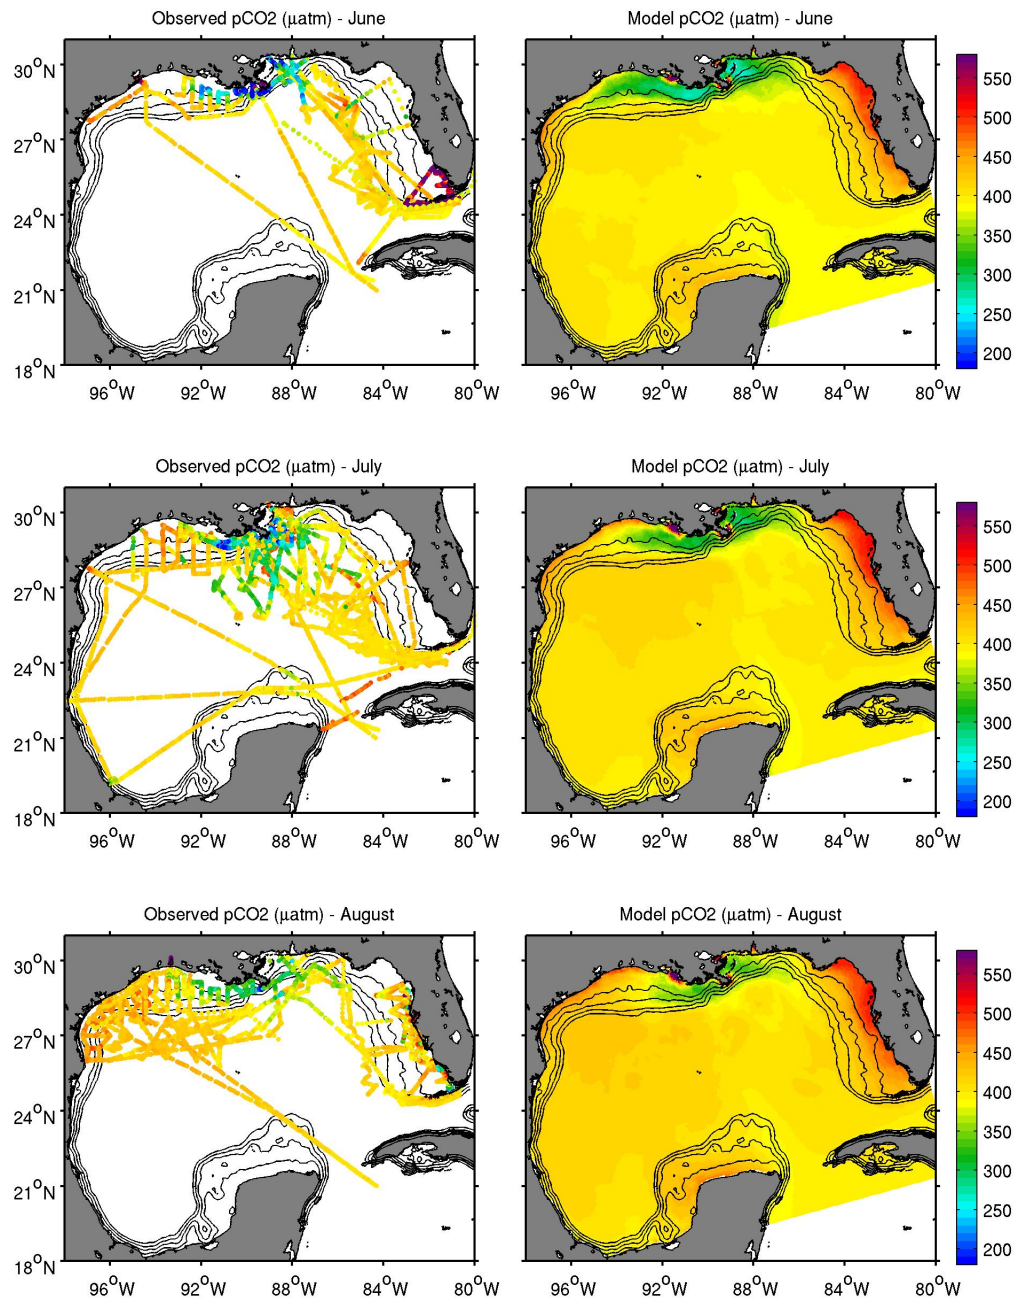

Figure S6. (Continuation).

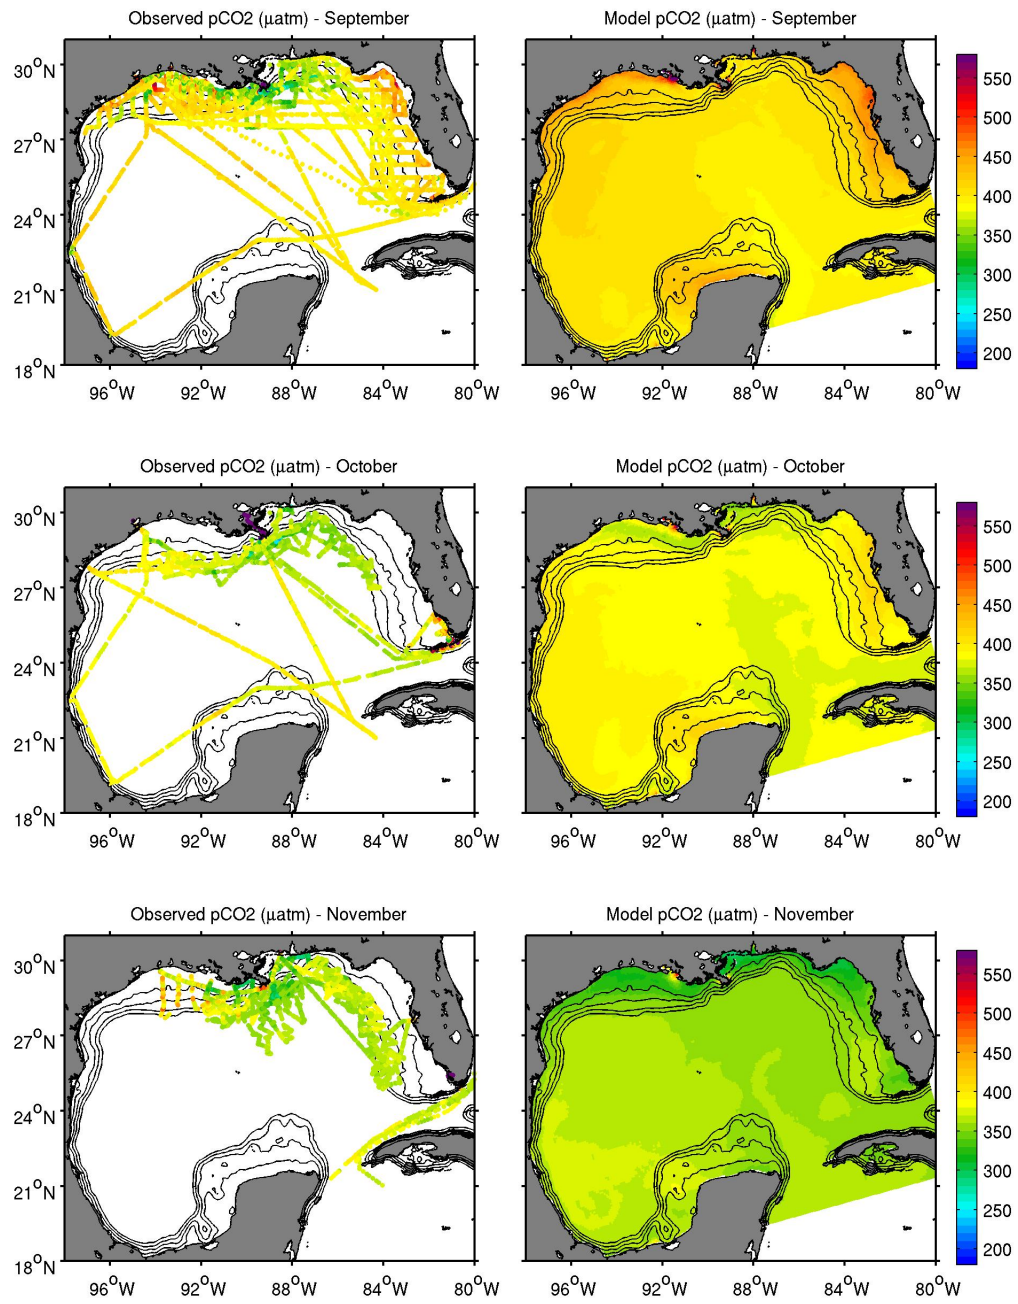

Figure S6. (Continuation).

## 5. Seasonal patterns for sea surface temperature

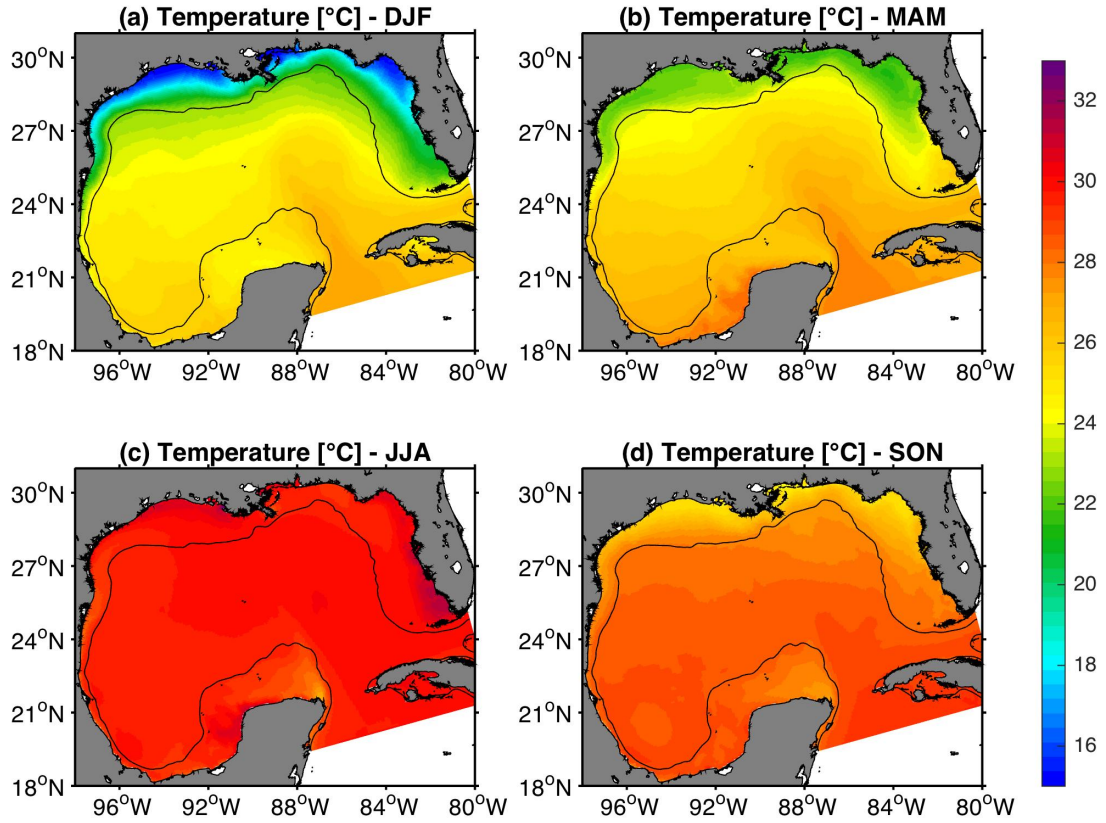

Figure S7. Mean model surface temperature in winter (DJF), spring (MAM), summer (JJA), and fall (SON) from 2005-2014. Black contour depicts the 200 m isobath.

## 6. Seasonal amplitude for surface aragonite saturation state and salinity

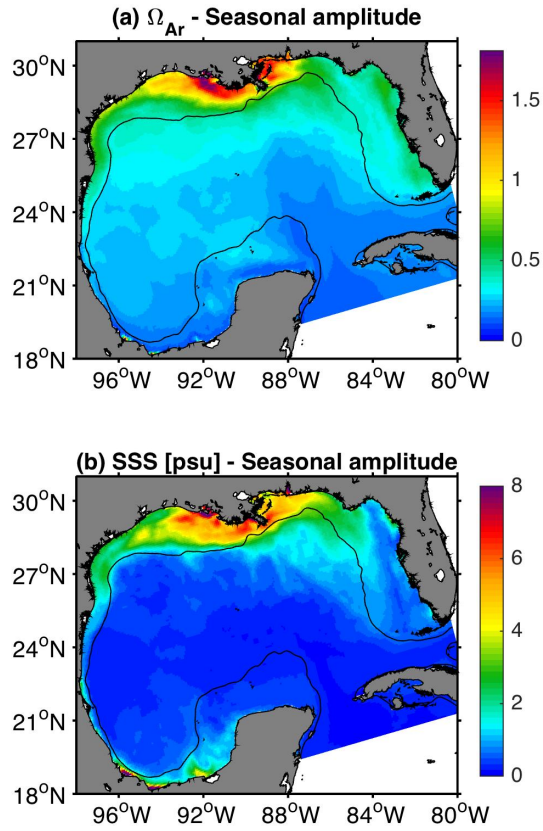

Figure S8. Seasonal amplitude patterns for surface aragonite saturation state and sea surface salinity from the model. Seasonal amplitude is defined as the difference between the maximum and minimum values from monthly average climatologies at each model grid point. Black contour depicts the 200 m isobath.

## 7. Seasonal patterns for surface salinity

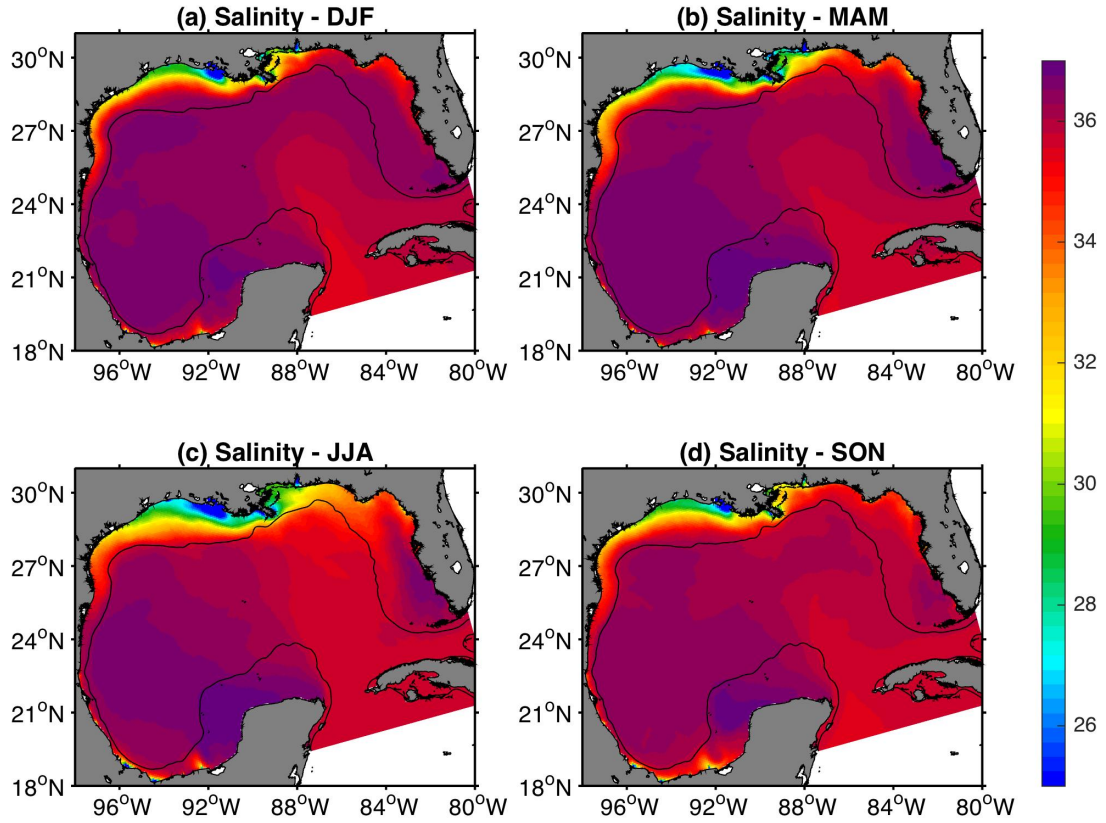

Figure S9. Mean model surface salinity in winter (DJF), spring (MAM), summer (JJA), and fall (SON) from 2005-2014. Black contour depicts the 200 m isobath.



## 8. Seasonal patterns for surface dissolved inorganic carbon

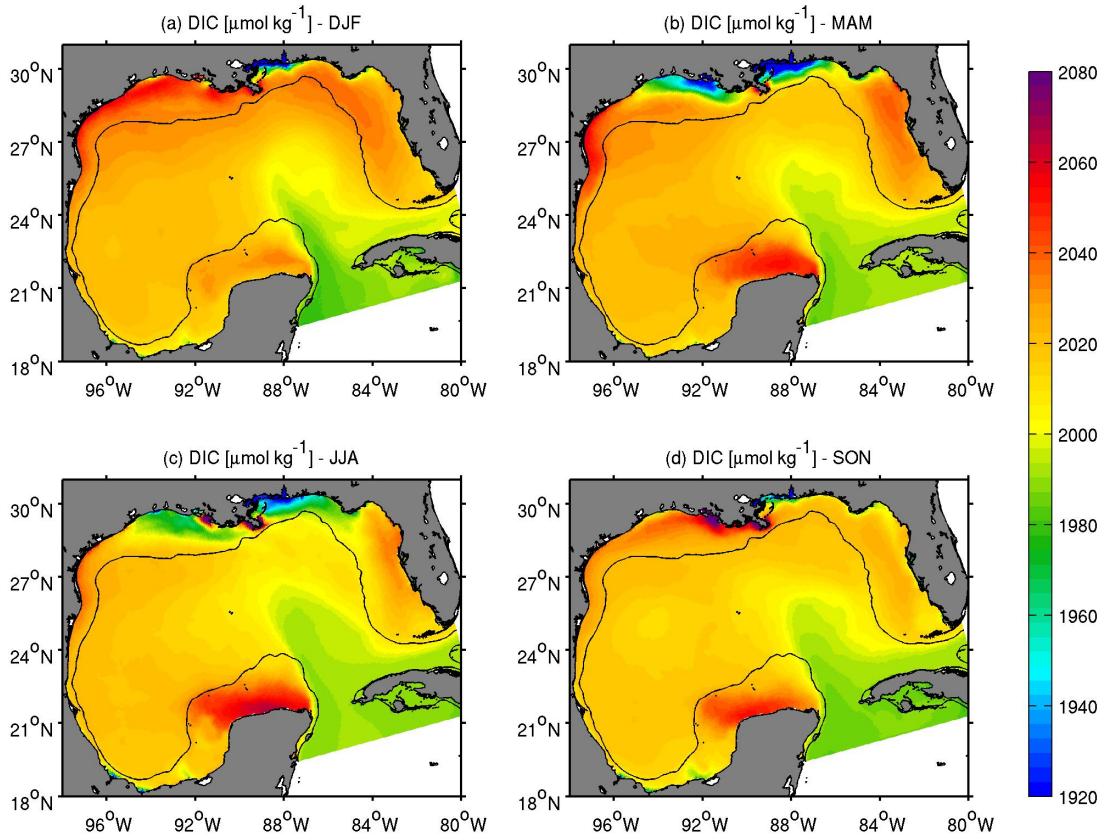

Figure S10. Mean model surface DIC in winter (DJF), spring (MAM), summer (JJA), and fall (SON) from 2005-2014. Black contour depicts the 200 m isobath.

## 9. Seasonal patterns for surface total alkalinity

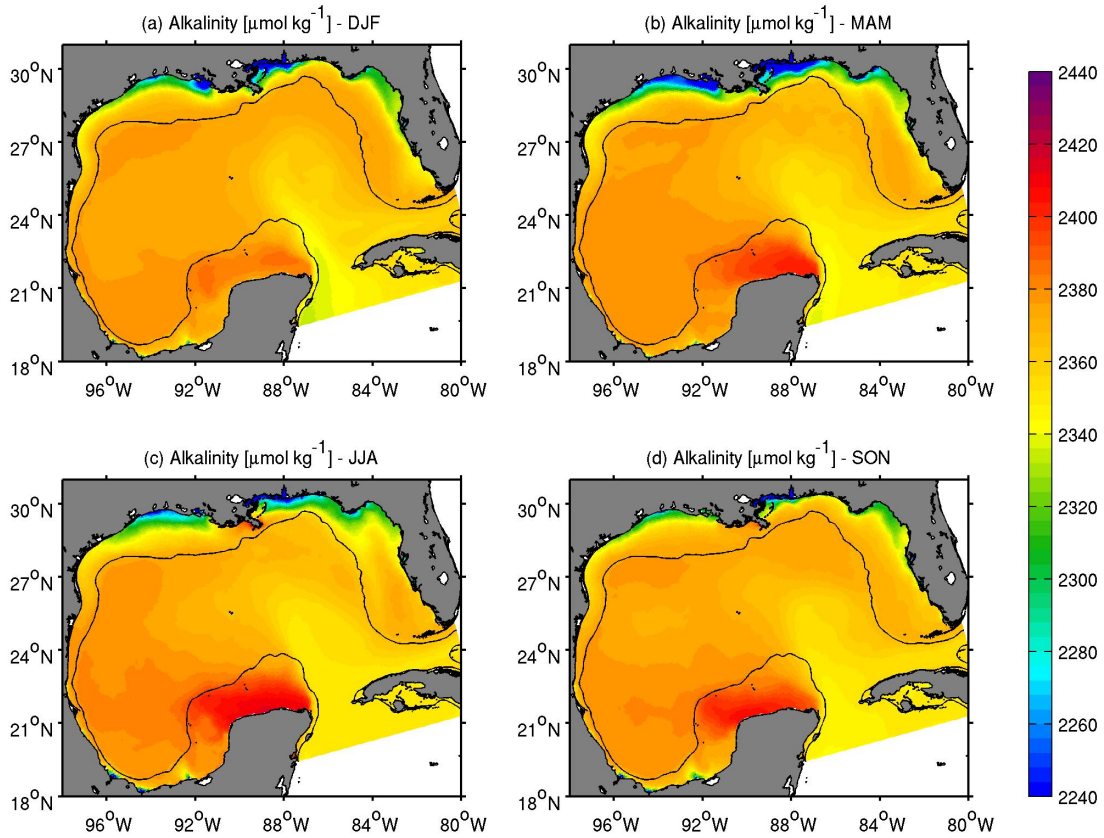

Figure S11. Mean model surface total alkalinity in winter (DJF), spring (MAM), summer (JJA), and fall (SON) from 2005-2014. Black contour depicts the 200 m isobath.

## 10. Zonal winds and carbon chemistry off northern Yucatan coast

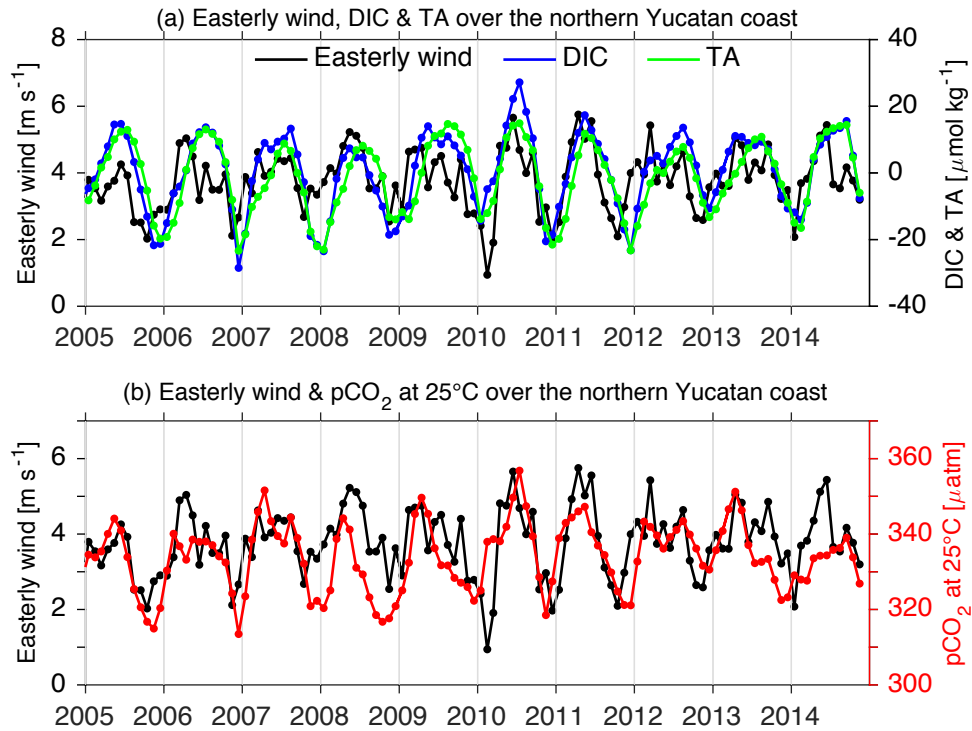

Figure S12. Detrended monthly time series of ERA-interim easterly winds (upwelling favorable for the northern Yucatan coast), model surface DIC and TA, and model surface  $\text{pCO}_2$  (normalized at  $25^\circ\text{C}$ ) over the northern Yucatan Peninsula margin. Note the long-term mean for the detrended DIC and TA series was removed ( $2,025$  and  $2,394 \mu\text{mol kg}^{-1}$ , respectively).
